# Supplementary material for: Solubility characteristics of soil humic substances as a function of pH
Source: Copernicus journal article supplement (doi:10.5194/egusphere-2023-2994), 2024-06-06
Supplement: Supplementary file 1 [file egusphere-2023-2994-supplement.pdf]

## Solubility-insolubility characteristics of soil humic substances as a function of pH

5 Xuemei Yang<sup>1,2</sup>, Jie Zhang<sup>1</sup>, Khan M.G. Mostofa<sup>1,3\*</sup>, Mohammad Mohinuzzaman<sup>1,4</sup>, H. Henry Teng<sup>1,3</sup>, Nicola Senesi<sup>5</sup>, Giorgio S. Senesi<sup>6</sup>, Jie Yuan<sup>7</sup>, Yu Liu<sup>1,3</sup>, Si-Liang Li<sup>1,3,8</sup>, Xiaodong Li<sup>1,3</sup>, Baoli Wang<sup>1,3</sup>, and Cong-Qiang Liu<sup>1,3\*</sup>

<sup>1</sup>School of Earth System Science, Tianjin University, 92 Weijin Road, Tianjin 300072, China.

<sup>2</sup>Institute of Ecology, College of Urban and Environmental Sciences, Peking University, Beijing, 100091, China

10 <sup>3</sup>Tianjin Key Laboratory of Earth Critical Zone Science and Sustainable Development in Bohai Rim, Tianjin University, Tianjin 300072, China

<sup>4</sup>Department of Environmental Science and Disaster Management, Noakhali Science and Technology University, Noakhali, Bangladesh.

<sup>5</sup>Dip.to di Scienze del Suolo, della Pianta e degli Alimenti, Università degli Studi di Bari "Aldo Moro", Via G. Amendola 165/A, 70126 BARI – Italy.

15 <sup>6</sup>CNR - Istituto per la Scienza e Tecnologia dei Plasmi (ISTP) - sede di Bari Via Amendola, 122/D - 70126 Bari, Italy.

<sup>7</sup>College of Resources and Environment, Xingtai University, Quanbei East Road 88, Qiaodong District, Xingtai City, Hebei Province.

<sup>8</sup>Haihe Laboratory of Sustainable Chemical Transformations, Tianjin 300192, China.

\*Corresponding author: Khan M.G. Mostofa or Cong-Qiang Liu ([mostofa@tju.edu.cn](mailto:mostofa@tju.edu.cn) or [liucongqiang@tju.edu.cn](mailto:liucongqiang@tju.edu.cn))

**Table S1. The pH values of diverse soils in the six continents and Antarctic and Arctic regions.**

| Continent     | Country/Region   | Soil type                                                       | pH        | Reference                          |
|---------------|------------------|-----------------------------------------------------------------|-----------|------------------------------------|
| Asia          | China            | Paddy (n = 1), Shanghai                                         | 7.82      | This study                         |
| "             | "                | Maize (n = 1), Tianjin                                          | 8.21      | "                                  |
| "             | "                | Forest (n = 25), 5 provinces                                    | 4.21–8.52 | "                                  |
| "             | "                | Riverside (n = 18), Tianjin+Hubei+Shaanxi                       | 5.80–8.89 | "                                  |
| "             | "                | Agriculture (n = 26), 5 provinces                               | 4.67–9.03 | "                                  |
| "             | "                | Degraded (n = 21), Tianjin + Inner Mongolia +Xinjiang + Shaanxi | 6.58–9.21 | "                                  |
| "             | "                | Grassland (n = 6), Xinjiang                                     | 7.15–7.99 | "                                  |
| "             | "                | Agriculture (n = 18), four main climate regions, China          | 4.90–8.80 | (Gao <i>et al.</i> , 2017)         |
| "             | "                | Cropped surface soil (n = 43)                                   | 6.44–8.01 | (Li <i>et al.</i> , 2019)          |
| "             | "                | Natural surface soil (n = 16)                                   | 5.01–8.67 | "                                  |
| "             | "                | Forest (n = 549), northern China                                | 3.88–9.39 | (Hong <i>et al.</i> , 2018)        |
| "             | "                | Forest (n = 4), eastern China                                   | 4.30–7.23 | (Xing <i>et al.</i> , 2019)        |
| "             | South Korea      | Greenhouse soil (n = 230)                                       | 4.50–7.60 | (Kim <i>et al.</i> , 2016)         |
| "             | Thailand         | Agriculture (n = 3)                                             | 5.60–6.10 | (Zhou <i>et al.</i> , 2019)        |
| "             | "                | non-agricultural lands (n = 4)                                  | 4.20–5.60 | "                                  |
| Europe        | Germany          | Bavarian Forest (n = 1)                                         | 4.00      | (Nägele and Conrad, 1990)          |
| "             | "                | Donau valley agriculture (n = 1)                                | 7.60      | "                                  |
| "             | "                | Wollmatingen agriculture (n = 1)                                | 7.80      | "                                  |
| "             | UK               | Grassland (n = 16)                                              | 3.70–7.20 | (Köhler <i>et al.</i> , 2016)      |
| "             | "                | Hoosfield acid strip at Rothamsted Research (n = 27)            | 4.10–8.30 | (Rousk <i>et al.</i> , 2009)       |
| "             | Sweden           | agriculture (n = 1)                                             | 7.80      | (Pietikäinen <i>et al.</i> , 2005) |
| "             | "                | Forest (n = 1)                                                  | 4.10      | "                                  |
| Africa        | Kenya            | Forestland, croplands, and grassland (n = 220)                  | 4.79–7.03 | (Odhiambo <i>et al.</i> , 2020)    |
| "             | Ethiopia         | Amhara Region (n = 475)                                         | 4.20–7.50 | (Mossa <i>et al.</i> , 2021)       |
| "             | Algeria          | saline wetland (n = 16)                                         | 6.88–7.75 | (Koull and Chehema, 2016)          |
| "             | Papua New Guinea | Sweet potato gardens (n = 209)                                  | 5.50–6.80 | (Bailey <i>et al.</i> , 2008)      |
| "             | Egypt            | The eastern desert plateau to the Nile Valley (n = 4)           | 7.80–8.00 | (Ramadan and Omar, 2000)           |
| "             | Morocco          | Agadir agricultural region (n = 4)                              | 7.37–7.95 | (Bihadassen <i>et al.</i> , 2020)  |
| "             | Austria          | Mawson Lakes, Kersbrook and Kulpara (n = 3)                     | 6.20–8.50 | (Cáceres <i>et al.</i> , 2008)     |
| South America | Ecuador          | Flavio Alfaro (n = 1)                                           | 6.8       | "                                  |
| "             | Costa Rica       | Forest (n = 3)                                                  | 4.10–4.15 | "                                  |
| "             | Brazil           | Deforestation (n = 8)                                           | 4.50–5.60 | (De Moraes <i>et al.</i> , 1996)   |
| "             | "                | Pasture (n = 36)                                                | 5.50–6.90 | "                                  |
| "             | Argentina        | Pampas pristine vegetation and forest (n = 1456)                | 6.60–8.30 | (Alvarez <i>et al.</i> , 2020)     |
| "             | Chile            | Western foot of the Andes Mountains (n = 35)                    | 5.20–7.20 | (Sadzawka R. <i>et al.</i> , 1972) |
| North America | USA              | California's primary agricultural valleys (n = 125)             | 5.50–8.20 | (DeClerck and Singer, 2003)        |
| "             | "                | Temperate steppe ecoregion (n = 36)                             | 5.67–6.95 | (Liebig <i>et al.</i> , 2017a)     |
| "             | "                | Agriculture (n = 34), North Dakota                              | 6.16–8.83 | (Liebig <i>et al.</i> , 2017b)     |
| "             | "                | Corn plots (n = 2), East Troy, WI                               | 5.40–8.40 | (Pedersen <i>et al.</i> , 2010)    |
| "             | "                | Riparian (n = 14), northwest Vermont                            | 5.40–6.60 | (Young and Ross, 2018)             |
| "             | "                | Agriculture (n = 61), south central Wisconsin                   | 6.20–7.10 | (Hartemink <i>et al.</i> , 2017)   |
| "             | "                | Northwest Alaska (n = 36)                                       | 3.90–5.02 | (Kim <i>et al.</i> , 2014)         |
| "             | Canada           | Acidic forest (n = 67)                                          | 2.80–6.30 | (Courchesne <i>et al.</i> , 1995)  |
| Antarctica    | Antarctica       | Bulgarian Antarctic Base (n = 38)                               | 4.81–8.61 | (Ganzert <i>et al.</i> , 2011)     |
| "             | "                | Gelic gleysols, tundra (n = 8)                                  | 4.23–8.48 | (Jones <i>et al.</i> , 2004)       |
| Arctic        | Arctic           | "                                                               | 5.75–7.03 | "                                  |

**Table S2. The pH values of rainwaters in the six continents and Arctic region.**

| Continent | Country             | Specific location                                                                                         | pH        | Reference                                      |
|-----------|---------------------|-----------------------------------------------------------------------------------------------------------|-----------|------------------------------------------------|
| Asia      | China               | Shenzhen (1986–2006, n = 20)                                                                              | 4.45–5.91 | (Huang <i>et al.</i> , 2008)                   |
| "         | "                   | Northwest of the Pearl River Delta (n = 6)                                                                | 4.55      | (Yongtai Yang, Wugeng Su, 1996)                |
| "         | "                   | North of the Pearl River Delta (n = 2)                                                                    | 4.84      | "                                              |
| "         | "                   | East of the Pearl River Delta (n=3)                                                                       | 5.22      | "                                              |
| "         | "                   | Jinhua City (n = 42), Zhejiang Province                                                                   | 3.64–6.76 | (Zhang <i>et al.</i> , 2007)                   |
| "         | "                   | Southeastern fringe of the Tengger Desert (n = 5)                                                         | 6.50–7.50 | (Zhang <i>et al.</i> , 2013)                   |
| "         | "                   | Changsha (1992–2001, n = 10)                                                                              | 3.00–4.69 | (Jiang Yimin, Zeng Guangmin, Zhang Gong, 2003) |
| "         | "                   | Nanjing (1992–2002, n = 192)                                                                              | 4.93–5.36 | (Tu <i>et al.</i> , 2005)                      |
| "         | "                   | Beijing (2001–2003, n = 65)                                                                               | 4.74–6.78 | (Yang <i>et al.</i> , 2004)                    |
| "         | "                   | Hong Kong (n = 32)                                                                                        | 3.60–6.40 | (Tanner and Wong, 2000)                        |
| "         | Israel              | Golan, Galilee, North-south coastal plain, Jordan, south Israel (n = 569)                                 | 5.30–7.57 | (Herut <i>et al.</i> , 2000)                   |
| "         | Jordan              | Eshidiya phosphate mine (n = 21)                                                                          | 5.33–7.90 | (Al-Khashman, 2005)                            |
| "         | Japan               | Tokyo (n = 2331)                                                                                          | 4.23–4.62 | (Okuda <i>et al.</i> , 2005)                   |
| "         | "                   | Northern area of Okinawa Island (n = 12)                                                                  | 5.03–5.64 | (Vuai and Tokuyama, 2011)                      |
| "         | South Korea         | Seoul (n = 129)                                                                                           | 4.20–5.80 | (Kyoung Lee <i>et al.</i> , 2000)              |
| "         | India               | A rural forest station near Bhubaneswar                                                                   | 4.00–7.50 | (Das <i>et al.</i> , 2010)                     |
| "         | "                   | Tirupati (n = 105)                                                                                        | 6.13–7.74 | (Chandra Mouli <i>et al.</i> , 2005)           |
| "         | "                   | Arabian Sea (2013)                                                                                        | 4.25–9.07 | (Ramaswamy <i>et al.</i> , 2017)               |
| Europe    | Europe              | 2000–2017 (n = 450)                                                                                       | 4.19–5.82 | (Keresztesi <i>et al.</i> , 2020)              |
| "         | Central East Europe | Belarus (2000–2017)                                                                                       | 4.56–5.33 | "                                              |
| "         | Northern Europe     | Estonia and United Kingdom (2000–2017)                                                                    | 4.47–5.15 | "                                              |
| "         | Southern Europe     | Serbia and Spain (2000–2017)                                                                              | 4.39–5.17 | "                                              |
| "         | Germany             | Berlin- Adlershof (WISTA Scientific Park) (n = 48)                                                        | 4.50–5.00 | (Möller, 2009)                                 |
| "         | "                   | Eastern Erzgebirge (n = 27)                                                                               | 3.26–5.38 | (Lange <i>et al.</i> , 2003)                   |
| "         | Greece              | Patras (n = 95)                                                                                           | 4.07–8.51 | (Glavas and Moschonas, 2002)                   |
| "         | Italy               | Sardinia (n = 27)                                                                                         | 5.24–7.48 | (Le Bolloch and Guerzoni, 1995)                |
| "         | Czech Republic      | Sumava Mts (n = 99)                                                                                       | 3.93–5.82 | (Elias <i>et al.</i> , 1995)                   |
| "         | Poland              | Moraine hills, lowlands and mountainous region (n = 24)                                                   | 4.14–5.61 | (Polkowska <i>et al.</i> , 2005)               |
| Africa    | South Africa        | Bergville in KwaZulu-Natal Province (n = 35), Metallic Bergville in KwaZulu-Natal Province (n = 42), Yard | 6.30–7.49 | (Selala <i>et al.</i> , 2018)                  |
| "         | "                   | Welgegound atmospheric (n = 20)                                                                           | 6.30–7.10 | "                                              |
| "         | "                   |                                                                                                           | 4.32–5.11 | (Kok, 2017)                                    |
| "         | Zimbabwe            | The University of Zimbabwe (n = 6)                                                                        | 5.60–6.72 | (Jonnalagadda <i>et al.</i> , 1994)            |
| "         | Niamey              | Banizoumbou (n = 7)                                                                                       | 4.90–5.40 | (Desboeufs <i>et al.</i> , 2010)               |
| Oceania   | Australia           | Sydney (n = 12)                                                                                           | 4.34–5.08 | (Ayers and Gillett, 1984)                      |

|                  |           |                                                                          |           |                                     |
|------------------|-----------|--------------------------------------------------------------------------|-----------|-------------------------------------|
| "                | "         | Katherine NT (n = 40)                                                    | 4.00–5.40 | (Bridgman, 1989)                    |
| "                | "         | Sydney NSW (n = 294)                                                     | 4.25–5.08 | "                                   |
| South<br>America | Ecuador   | Eastern Andes Cordillera (n = 11)                                        | 4.54–5.61 | (Beiderwieden <i>et al.</i> , 2005) |
| "                | Brazil    | Limeira (n = 30)                                                         | 4.90–6.90 | (Martins <i>et al.</i> , 2019)      |
| "                | "         | Porto Alegre (n = 177)                                                   | 5.30      | "                                   |
| "                | "         | Florianópolis (n = 22)                                                   | 4.79      | "                                   |
| "                | Argentine | Bahía Blanca (n = 11)                                                    | 6.95–9.01 | (Campo <i>et al.</i> , 2012)        |
| "                | "         | Tandil (n = 10)                                                          | 6.35–8.04 | "                                   |
| North<br>America | USA       | USA (n = 86470), Wye, Maryland and Yosemite and Yosemite National Park   | 3.04–8.29 | (Keresztesi <i>et al.</i> , 2020)   |
| "                | "         | America's Midwest                                                        | 5.10–6.40 | "                                   |
| "                | "         | Eastern part of the USA                                                  | 4.30–6.10 | "                                   |
| "                | "         | An open area of the University of North Carolina at Wilmington (n = 81)  | 3.85      | (Kieber <i>et al.</i> , 2001)       |
| "                | "         | An open area of the University of North Carolina at Wilmington (n = 120) | 4.39–4.76 | (Kieber <i>et al.</i> , 2007)       |
| "                | "         | An open area of the University of North Carolina at Wilmington (n = 19)  | 4.42–5.49 | (Kieber <i>et al.</i> , 2009)       |
| "                | "         | An open area of the University of North Carolina at Wilmington (n = 23)  | 4.00–5.20 | (Witt <i>et al.</i> , 2007)         |
| "                | "         | Luquillo Mountains (n = 2075)                                            | 3.20–7.90 | (Gioda <i>et al.</i> , 2013)        |
| "                | Canada    | Guelph (n = 360)                                                         | 5.20–8.20 | (Despins <i>et al.</i> , 2009)      |
| Arctic           | Arctic    | Hornsund Polish Polar Station (n = 33)                                   | 3.35–5.15 | (Nawrot <i>et al.</i> , 2016)       |

25 **Table S3 Soil properties of the two soils.**

| Sample name   | Location    | Soil classification | Water content (%) | Sand (%) | Silt (%) | clay (%) | pH   | EC (µs/cm) | STC (mg/g) | STN (mg/g) |
|---------------|-------------|---------------------|-------------------|----------|----------|----------|------|------------|------------|------------|
| Maize land    | N38°59'32"- | Calcaric            | 20.3              | 22.5     | 57.6     | 8.6      | 8.21 | 356        | 17.4       | 4.71       |
| (Agriculture) | E117°17'25" | Fluvisol            |                   |          |          |          |      |            |            |            |
| Paddy field   | N31°21'22"- | Fluvi-stagnic       | 39.4              | 36.0     | 38.3     | 2.5      | 7.82 | 297        | 14.38      | 4.21       |
| (Wetland)     | E121°45'24" | Fluvisol            |                   |          |          |          |      |            |            |            |

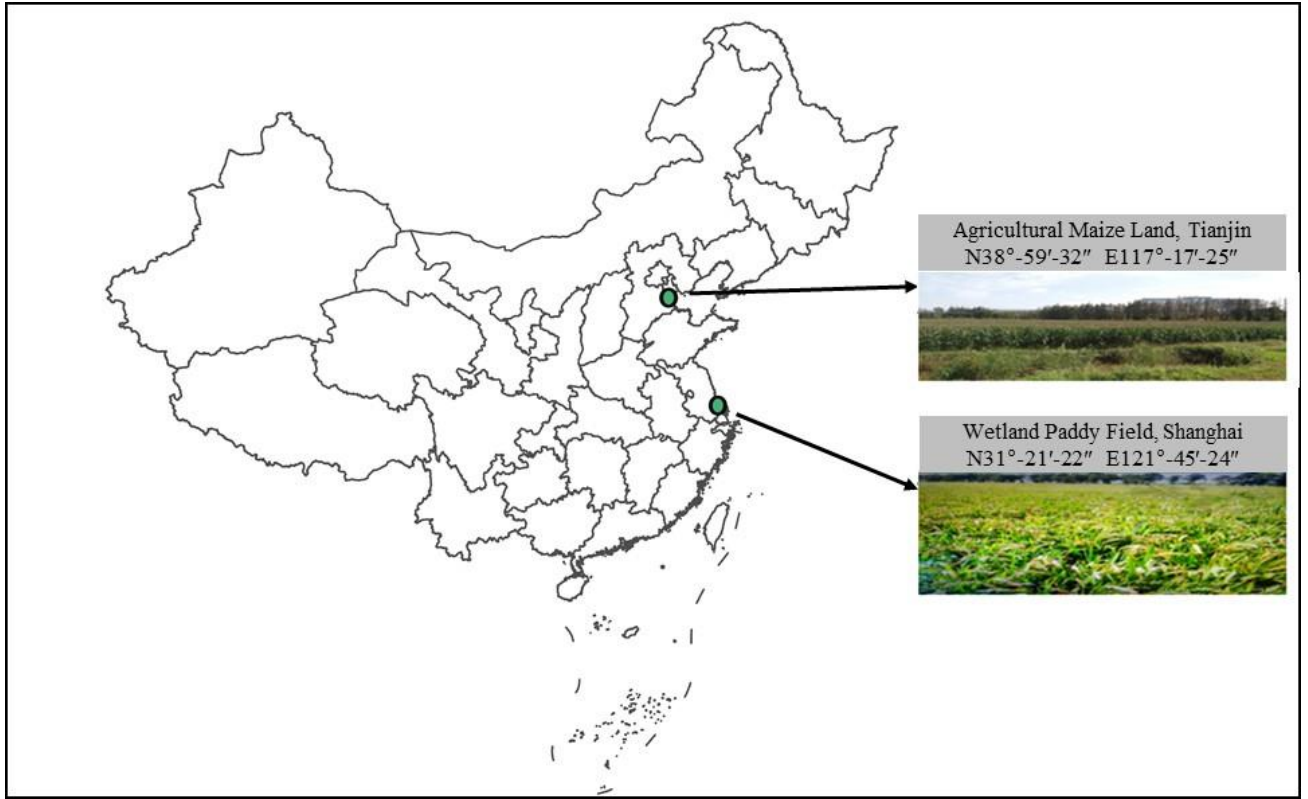

30 Figure S1. Soil sampling locations.

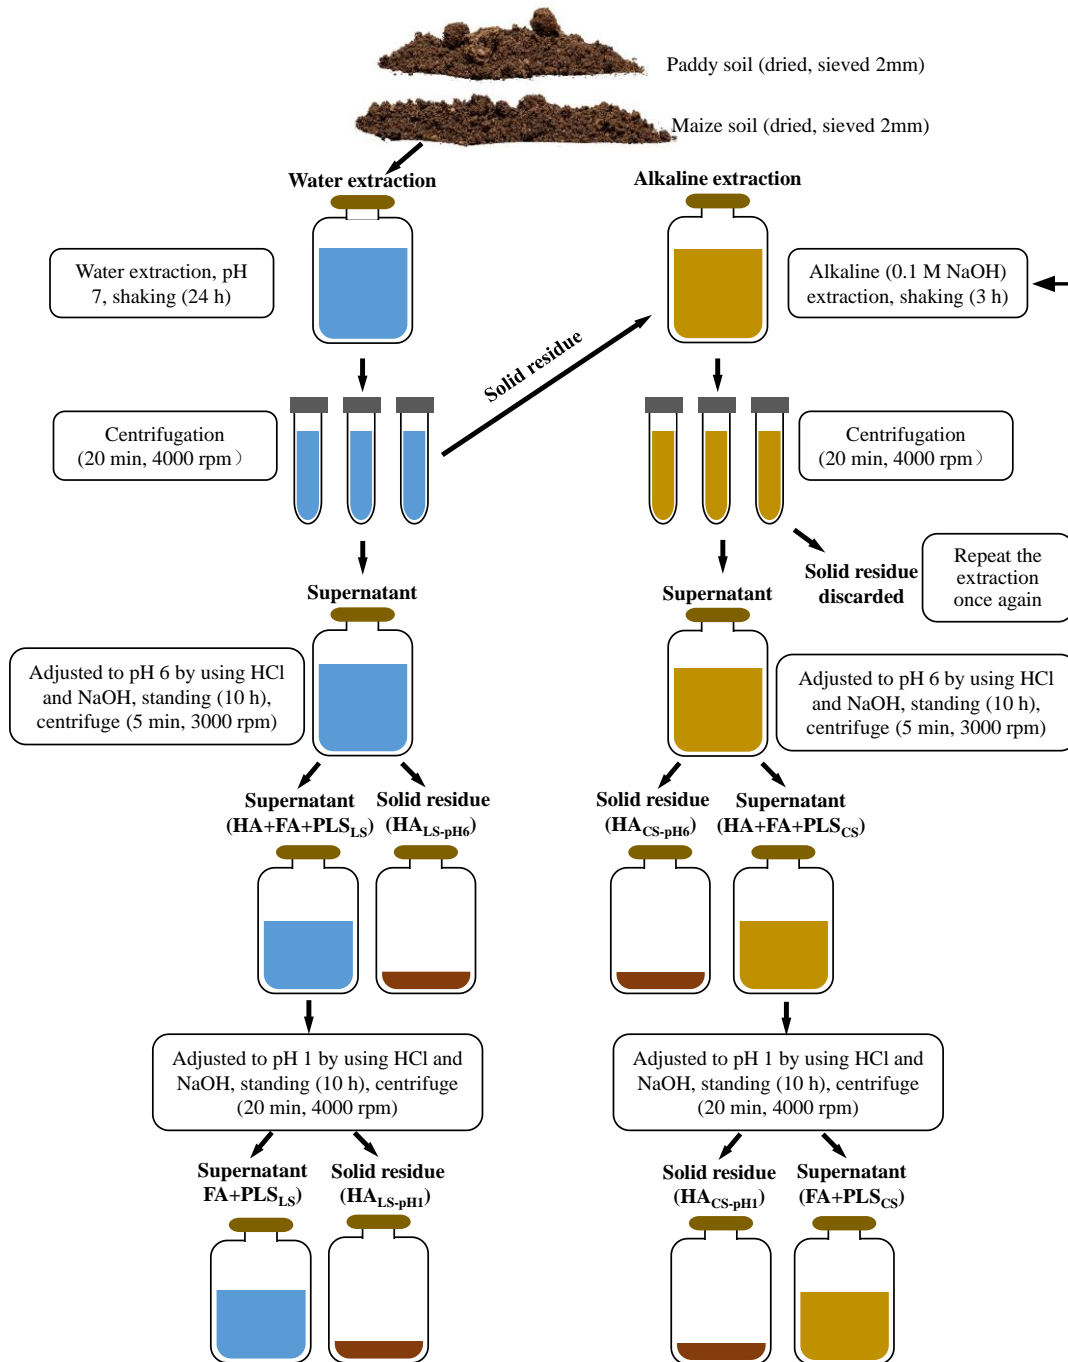

**Figure S2. Flow diagram of the extraction of soil liquid phase by water followed by alkaline (0.1 M NaOH) solution, which would operationally represent, respectively, the labile state (LS) and the water insoluble complexed state (CS) of soil organic matter (SOM).**

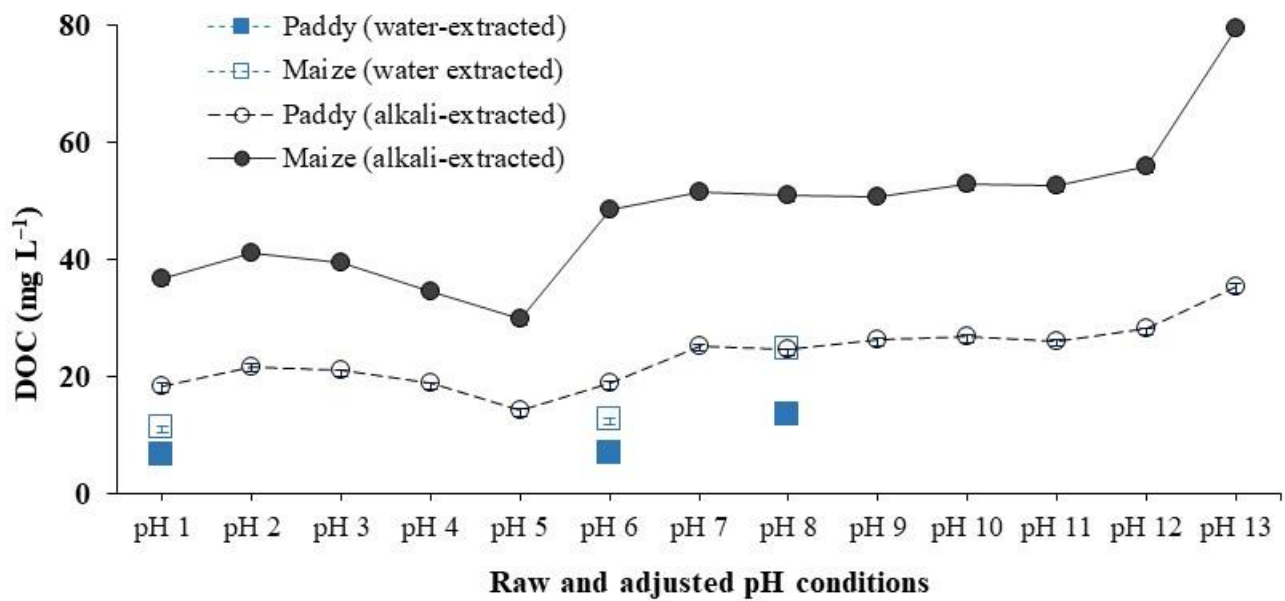

Figure S3. DOC contents of the pH-adjusted HS<sub>L</sub>s and HS<sub>C</sub>s from paddy and maize soils.



## References

- Al-Khashman OA. 2005. Study of chemical composition in wet atmospheric precipitation in Eshidiya area, Jordan. *Atmos Environ.* 39: 6175–6183.
- 45 Alvarez R, Gimenez A, Pagnanini F, Recondo V, Gangi D, Caffaro M, De Paepe JL, Berhongaray G. 2020. Soil acidity in the Argentine Pampas: Effects of land use and management. *Soil Tillage Res.* 196: 104434. Elsevier.
- Ayers GP, Gillett RW. 1984. Some observations on the acidity and composition of rainwater in Sydney, Australia, during the summer of 1980-81. *J Atmos Chem.* 2: 25–46.
- 50 Bailey JS, Ramakrishna A, Kirchhof G. 2008. Relationships between important soil variables in moderately acidic soils (pH  $\geq$ 5.5) in the highlands of Papua New Guinea and management implications for subsistence farmers. *Soil Use Manag.* 24: 281–291.
- Beiderwieden E, Wrzesinsky T, Klemm O. 2005. Chemical characterization of fog and rain water collected at the eastern Andes cordillera. *Hydrol Earth Syst Sci.* 9: 185–191.
- 55 Bihadassen B, Hassi M, Hamadi F, Aitalla A, Bourouache M, EL Boulani A, Mimouni R. 2020. Irrigation of a golf course with UV-treated wastewater: effects on soil and turfgrass bacteriological quality. *Appl Water Sci.* 10: 1–10. Springer International Publishing.
- Le Bolloch O, Guerzoni S. 1995. Acid and alkaline deposition in precipitation on the Western coast of Sardinia, Central Mediterranean (40° N, 8° E). *Water, Air, Soil Pollut.* 85: 2155–2160.
- 60 Bridgman HA. 1989. Acid rain studies in Australia and New Zealand. *Arch Environ Contam Toxicol.* 18: 137–146.
- Cáceres T, Megharaj M, Naidu R. 2008. Degradation of fenamiphos in soils collected from different geographical regions: The influence of soil properties and climatic conditions. *J Environ Sci Heal - Part B Pestic Food Contam Agric Wastes.* 43: 314–322.
- 65 Campo AM, Zapperi PA, Picone N. 2012. 396 . Precipitation and rainwater pH spatial distribution in Bahía. *Analysis.* 3: 8–11.
- De Caritat P, Cooper M, Wilford J. 2011. The pH of Australian soils: Field results from a national survey. *Soil Res.* 49: 173–182.
- Chandra Mouli P, Venkata Mohan S, Reddy SJ. 2005. Rainwater chemistry at a regional representative urban site: Influence of terrestrial sources on ionic composition. *Atmos Environ.* 39: 999–1008.
- 70 Courchesne F, Savoie S, Dufresne A. 1995. Effects of air-drying on the measurement of soil pH in acidic forest soils of Quebec, Canada. *Soil Science.* .
- Das N, Das R, Chaudhury GR, Das SN. 2010. Chemical composition of precipitation at background level. *Atmos Res.* 95: 108–113. Elsevier B.V.
- 75 DeClerck F, Singer MJ. 2003. Looking back 60 years, California soils maintain overall chemical quality. *Calif Agric.* 57: 38–41.

- Desboeufs K, Journet E, Rajot JL, Chevaillier S, Triquet S, Formenti P, Zakou A. 2010. Chemistry of rain events in West Africa: Evidence of dust and biogenic influence in convective systems. *Atmos Chem Phys*. 10: 9283–9293.
- 80 Despins C, Farahbakhsh K, Leidl C. 2009. Assessment of rainwater quality from rainwater harvesting systems in Ontario, Canada. *J Water Supply Res Technol - AQUA*. 58: 117–134.
- Elias V, Tesar M, Buchtele J. 1995. Occult precipitation: sampling, chemical analysis and process modelling in the Sumava Mts., (Czech Republic) and in the Taunus Mts. (Germany). *J Hydrol*. 166: 409–420.
- 85 Ganzert L, Lipski A, Hubberten HW, Wagner D. 2011. The impact of different soil parameters on the community structure of dominant bacteria from nine different soils located on Livingston Island, South Shetland Archipelago, Antarctica. *FEMS Microbiol Ecol*. 76: 476–491.
- Gao J, Liang C, Shen G, Lv J, Wu H. 2017. Spectral characteristics of dissolved organic matter in various agricultural soils throughout China. *Chemosphere*. 176: 108–116. Elsevier Ltd.
- 90 Gioda A, Mayol-Bracero OL, Scatena FN, Weathers KC, Mateus VL, McDowell WH. 2013. Chemical constituents in clouds and rainwater in the Puerto Rican rainforest: Potential sources and seasonal drivers. *Atmos Environ*. 68: 208–220. Elsevier Ltd.
- Glavas S, Moschonas N. 2002. Origin of observed acidic-alkaline rains in a wet-only precipitation study in a Mediterranean coastal site, Patras, Greece. *Atmos Environ*. 36: 3089–3099.
- 95 Hartemink AE, Gennadiyev AN, Bockheim JG, Bero N. 2017. Short-range variation in a Wisconsin soilscape (USA). *Eurasian Soil Sci*. 50: 198–209.
- Herut B, Starinsky A, Katz A, Rosenfeld D. 2000. Relationship between the acidity and chemical composition of rainwater and climatological conditions along a transition zone between large deserts and Mediterranean climate, Israel. *Atmos Environ*. 34: 1281–1292.
- 100 Hong S, Piao S, Chen A, Liu Y, Liu L, Peng S, Sardans J, Sun Y, Peñuelas J, Zeng H. 2018. Afforestation neutralizes soil pH. *Nat Commun*. 9: 1–7. Springer US.
- Huang Y, Wang Y, Zhang L. 2008. Long-term trend of chemical composition of wet atmospheric precipitation during 1986–2006 at Shenzhen City, China. *Atmos Environ*. 42: 3740–3750.
- Jiang Yimin, Zeng Guangmin, Zhang Gong LH. 2003. Atmospheric Acid Deposition Chemistry and the Variational Characteristics in Changsha City. *URBAN Environ & URBAN Ecol*. 16: 23–25.
- 105 Jones DL, Farrar JF, Newsham KK. 2004. Rapid amino acid cycling in Arctic and Antarctic soils. *Water, Air, Soil Pollut Focus*. 4: 169–175.
- Jonnalagadda SB, Makadho J, Matinde N, Karimanzira RP, Makarau A. 1994. Chemical composition of rainwater and air quality in Zimbabwe, Africa. *Sci Total Environ*. 144: 261–271.
- 110 Keresztesi Á, Nita IA, Boga R, Birsan MV, Bodor Z, Szép R. 2020. Spatial and long-term analysis of rainwater chemistry over the conterminous United States. *Environ Res*. 188.

- Kieber RJ, Smith J, Mullaugh KM, Southwell MW, Avery GB, Willey JD. 2009. Influence of dissolved organic carbon on photochemically mediated cycling of hydrogen peroxide in rainwater. *J Atmos Chem.* 64: 149–158.
- 115 Kieber RJ, Willey JD, Whitehead RF, Reid SN. 2007. Photobleaching of chromophoric dissolved organic matter (CDOM) in rainwater. *J Atmos Chem.* 58: 219–235.
- Kieber RJ, Williams K, Willey JD, Skrabal S, Avery GB. 2001. Iron speciation in coastal rainwater: Concentration and deposition to seawater. *Mar Chem.* 73: 83–95.
- Kim HM, Jung JY, Yergeau E, Hwang CY, Hinzman L, Nam S, Hong SG, Kim OS, Chun J, Lee YK. 2014. Bacterial community structure and soil properties of a subarctic tundra soil in Council, Alaska. 120 *FEMS Microbiol Ecol.* 89: 465–475.
- Kim JM, Roh AS, Choi SC, Kim EJ, Choi MT, Ahn BK, Kim SK, Lee YH, Joa JH, Kang SS, Lee SA, Ahn JH, Song J, Weon HY. 2016. Soil pH and electrical conductivity are key edaphic factors shaping bacterial communities of greenhouse soils in Korea. *J Microbiol.* 54: 838–845.
- Köhler IH, Macdonald AJ, Schnyder H. 2016. Last-century increases in intrinsic water-use efficiency of 125 grassland communities have occurred over a wide range of vegetation composition, nutrient inputs, and soil pH. *Plant Physiol.* 170: 881–890.
- Kok L. 2017. Wet deposition at a regional background site in South Africa – influence of air mass origin and rain intensity on chemical composition Dissertation submitted in fulfilment of the requirements for the Potchefstroom Campus of the North-West University. North-West University.
- 130 Koull N, Chehma A. 2016. Soil characteristics and plant distribution in saline wetlands of Oued Righ, northeastern Algeria. *J Arid Land.* 8: 948–959.
- Kyoung Lee B, Hee Hong S, Soo Lee D. 2000. Chemical composition of precipitation and wet deposition of major ions on the Korean peninsula. *Atmos Environ.* 34: 563–575.
- Lange CA, Matschullat J, Zimmermann F, Sterzik G, Wienhaus O. 2003. Fog frequency and chemical 135 composition of fog water - A relevant contribution to atmospheric deposition in the eastern Erzgebirge, Germany. *Atmos Environ.* 37: 3731–3739.
- Li S, Li M, Wang G, Sun X, Xi B, Hu Z. 2019. Compositional and chemical characteristics of dissolved organic matter in various types of cropped and natural Chinese soils. *Chem Biol Technol Agric.* 6: 1–11. Springer International Publishing.
- 140 Liebig MA, Ryschawy J, Kronberg SL, Archer DW, Scholljegerdes EJ, Hendrickson JR, Tanaka DL. 2017a. Integrated crop-livestock system effects on soil N, P, and pH in a semiarid region. *Geoderma.* 289: 178–184. Elsevier B.V.
- Liebig MA, Wang GJ, Aberle E, Eriksmoen E, Nyren PE, Staricka JA, Nichols K. 2017b. Soil response to perennial herbaceous biofeedstocks under rainfed conditions in the northern Great Plains, USA. 145 *Geoderma.* 290: 10–18. Elsevier B.V.

- Martins EH, Nogarotto DC, Mortatti J, Pozza SA. 2019. Chemical composition of rainwater in an urban area of the southeast of Brazil. *Atmos Pollut Res.* 10: 520–530.
- Möller D. 2009. Atmospheric hydrogen peroxide: Evidence for aqueous-phase formation from a historic perspective and a one-year measurement campaign. *Atmos Environ.* 43: 5923–5936.
- 150 De Moraes JFL, Volkoff B, Cerri CC, Bernoux M. 1996. Soil properties under Amazon forest and changes due to pasture installation in Rondônia, Brazil. *Geoderma.* 70: 63–81.
- Mossa A-W, Gashu D, Broadley MR, Dunham SJ, McGrath SP, Bailey EH, Young SD. 2021. The effect of soil properties on zinc lability and solubility in soils of Ethiopia – an isotopic dilution study. *Soil.* 7: 255–268.
- 155 Nägele W, Conrad R. 1990. Influence of soil pH on the nitrate-reducing microbial populations and their potential to reduce nitrate to NO and N<sub>2</sub>O. *FEMS Microbiol Lett.* 74: 49–57.
- Nawrot AP, Migala K, Luks B, Pakszys P, Glowacki P. 2016. Chemistry of snow cover and acidic snowfall during a season with a high level of air pollution on the Hans Glacier, Spitsbergen. *Polar Sci.* 10: 249–261.
- 160 Odhiambo BO, Kenduiywo BK, Were K. 2020. Spatial prediction and mapping of soil pH across a tropical afro-montane landscape. *Appl Geogr.* 114: 102129. Elsevier Ltd.
- Okuda T, Iwase T, Ueda H, Suda Y, Tanaka S, Dokiya Y, Fushimi K, Hosoe M. 2005. Long-term trend of chemical constituents in precipitation in Tokyo metropolitan area, Japan, from 1990 to 2002. *Sci Total Environ.* 339: 127–141.
- 165 Pedersen P, Tylka GL, Mallarino A, Macguidwin AE, Koval NC, Grau CR. 2010. Correlation between soil pH, heterodera glycinis population densities, and soybean yield. *Crop Sci.* 50: 1458–1464.
- Pietikäinen J, Pettersson M, Bååth E. 2005. Comparison of temperature effects on soil respiration and bacterial and fungal growth rates. *FEMS Microbiol Ecol.* 52: 49–58.
- Polkowska Z, Astel A, Walna B, Małek S, Mędrzycka K, Górecki T, Siepak J, Namieśnik J. 2005. Chemometric analysis of rainwater and throughfall at several sites in Poland. *Atmos Environ.* 39: 837–855.
- 170 Ramadan T, Omar SA. 2000. Mycorrhizal associations with some plant species in a soil strip of different successional stages in Egypt. *J Plant Nutr.* 23: 1153–1166.
- Ramaswamy V, Muraleedharan PM, Babu CP. 2017. Mid-troposphere transport of Middle-East dust over the Arabian Sea and its effect on rainwater composition and sensitive ecosystems over India. *Sci Rep.* 7.
- 175 Rousk J, Brookes PC, Bååth E. 2009. Contrasting soil pH effects on fungal and bacterial growth suggest functional redundancy in carbon mineralization. *Appl Environ Microbiol.* 75: 1589–1596.
- Sadzawka R. MA, Melendez A. E, Aomine S. 1972. The ph of chilean volcanic ash soils trumaos. *Soil Sci Plant Nutr.* 18: 191–197.
- 180

- Selala MS, Thenga H, Jewitt GPW, Chaplot V. 2018. Comparison of the chemical quality of rainwater harvested from roof and surface run-off systems. *Water SA*. 44: 223–231.
- Tanner PA, Wong AYS. 2000. Soluble trace metals and major ionic species in the bulk deposition and atmosphere of Hong Kong. *Water Air Soil Pollut*. 122: 261–279.
- 185 Tu J, Wang H, Zhang Z, Jin X, Li W. 2005. Trends in chemical composition of precipitation in Nanjing, China, during 1992-2003. *Atmos Res*. 73: 283–298.
- Vuai SAH, Tokuyama A. 2011. Trend of trace metals in precipitation around Okinawa Island, Japan. *Atmos Res*. 99: 80–84. Elsevier B.V.
- Wanek W, Zezula D, Wasner D, Mooshammer M, Prommer J. 2019. A novel isotope pool dilution  
190 approach to quantify gross rates of key abiotic and biological processes in the soil phosphorus cycle. *Biogeosciences*. 16: 3047–3068.
- Witt M, Skrabal S, Kieber R, Willey J. 2007. Copper complexation in coastal rainwater, southeastern USA. *Atmos Environ*. 41: 3619–3630.
- Xing J, Wang H, Brookes PC, Salles JF, Xu J. 2019. Soil pH and microbial diversity constrain the survival  
195 of *E. coli* in soil. *Soil Biol Biochem*. 128: 139–149. Elsevier.
- Yang FM, He K Bin, Lei Y, Ma YL, Yu XC, Tanaka S, Okuda T, Iwase T. 2004. Chemical characters of atmospheric precipitation in Beijing in years of 2001-2003. *Zhongguo Huanjing Kexue/China Environ Sci*. 24: 538.
- Yongtai Yang, Wugeng Su WM. 1996. Regional Characteristics of the Chemical Composition of  
200 Precipitation in the Pearl River Delta. *Chongqing Environ Sci*. 18: 5–9.
- Young EO, Ross DS. 2018. Phosphorus mobilization in flooded riparian soils from the Lake Champlain Basin, VT, USA. *Front Environ Sci*. 6: 1–12.
- Zhang M, Wang S, Wu F, Yuan X, Zhang Y. 2007. Chemical compositions of wet precipitation and anthropogenic influences at a developing urban site in southeastern China. *Atmos Res*. 84: 311–322.
- 205 Zhang Y feng, Wang X ping, Hu R, Pan Y xia, Zhang H. 2013. Stemflow in two xerophytic shrubs and its significance to soil water and nutrient enrichment. *Ecol Res*. 28: 567–579.
- Zhou W, Han G, Liu M, Li X. 2019. Effects of soil pH and texture on soil carbon and nitrogen in soil profiles under different land uses in Mun River Basin, Northeast Thailand. *PeerJ*. 2019.
